# Supplementary material
Source: Springer Nature journal article supplement (https://www.springermedizin.de/resource/supplementary/13054_2011_494_MOESM2_ESM.pdf/9708608)

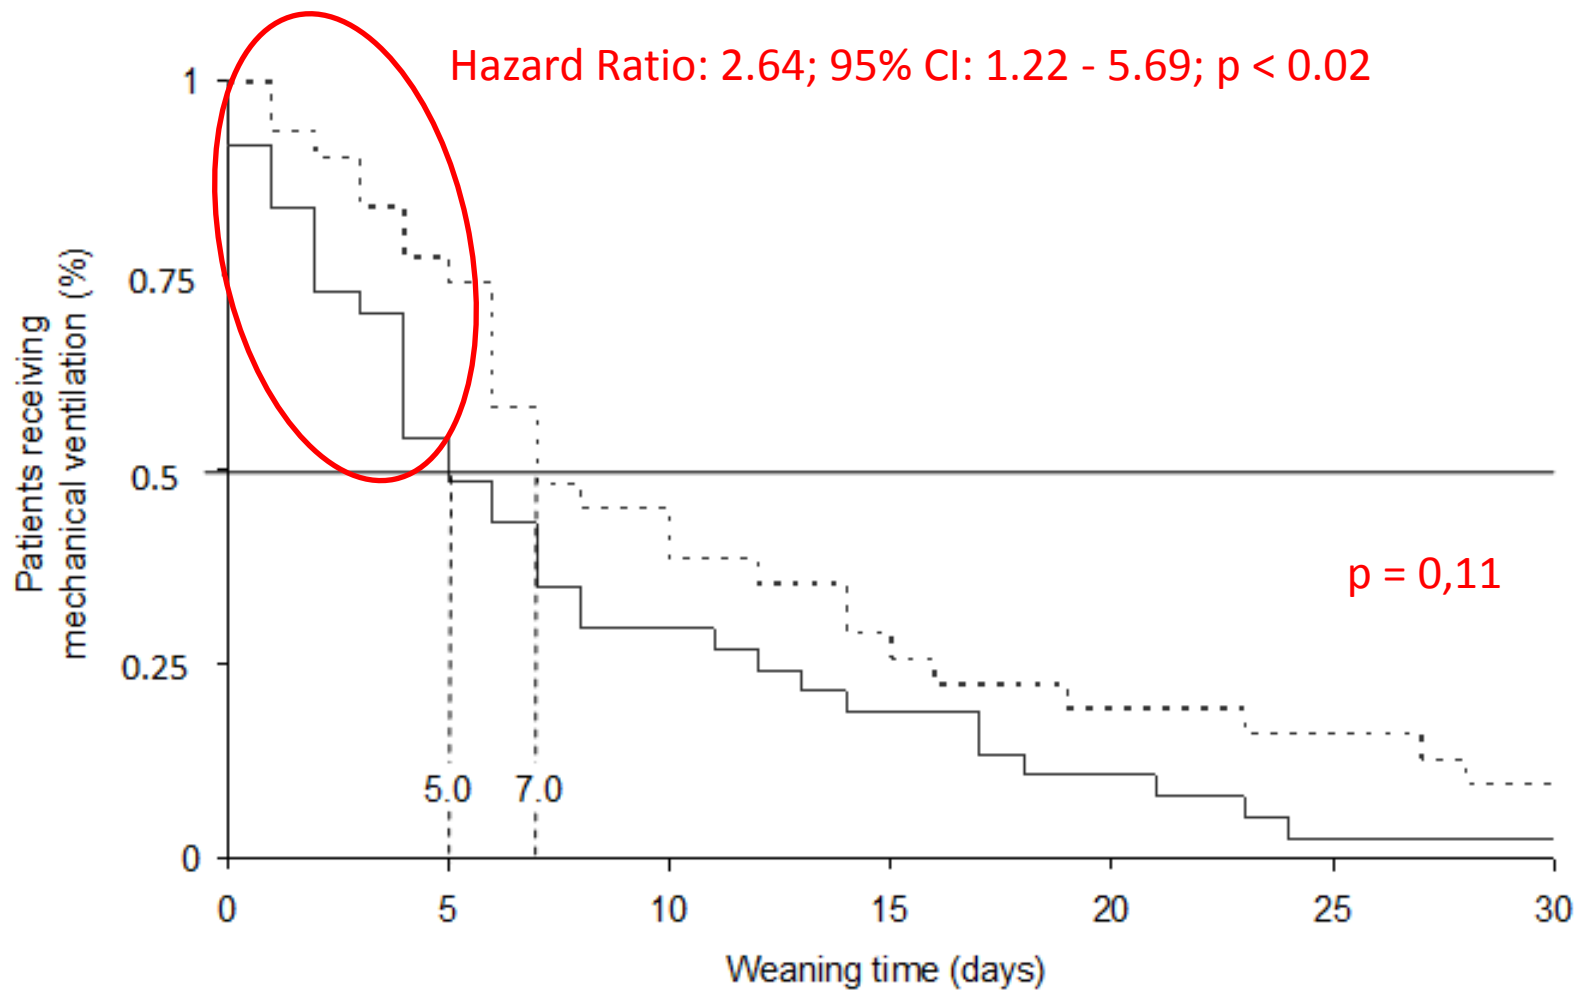

Number of patients remaining on MV

|           | Baseline | Day 5 | Day 10 | Day 15 | Day 20 | Day 25 | Day 30 |
|-----------|----------|-------|--------|--------|--------|--------|--------|
| Methadone | 37       | 18    | 13     | 11     | 10     | 8      | 8      |
| Control   | 31       | 24    | 15     | 13     | 11     | 10     | 8      |

Supplement: MOESM2 [file 9708608]
